# Supplementary material
Source: publisher site journal article supplement (http://www.kjim.org/upload/media/kjim-2023-098-Supplementary-Material-1.pdf)
Supplement: Supplementary file 1 [file kjim-2023-098-Supplementary-Material-1.pdf]

### Supplementary Material 1. Search strategy.

PubMed: 1577

#1:anticoagulants [Mesh]

#2: "anticoagulant\*" [Title/Abstract] OR "anticoagulant agent\*" [Title/Abstract] OR "anticoagulation agent\*" [Title/Abstract] OR "indirect thrombin inhibitor\*" [Title/Abstract] OR "anticoagulant drug\*" [Title/Abstract] OR "Anticoagulant therapy" [Title/Abstract]

#3:heparin [Mesh] OR Fondaparinux [Mesh] OR Heparin, Low-Molecular-Weight [Mesh]

#4:heparin [Title/Abstract] OR enoxaparin\* [Title/Abstract] OR dalteparin\* [Title/Abstract] OR tinzaparin\* [Title/Abstract] OR nadroparin\* [Title/Abstract] OR Fondaparinux [Title/Abstract] OR "heparin low molecular weight" [Title/Abstract] OR "heparin low molecular weight" [Title/Abstract] OR "Low Molecular Weight Heparin" [Title/Abstract] OR LMWH [Title/Abstract] OR "Unfractionated heparin" [Title/Abstract] OR UFH [Title/Abstract]

#5:Warfarin [MeSH Terms]

#6:Warfarin [Title/Abstract] OR "vitamin k antagonist\*" [Title/Abstract] OR vka\* [Title/Abstract]

#7:Dabigatran [MeSH] OR Rivaroxaban [MeSH] OR Factor Xa Inhibitors [MeSH]

#8:dabigatran [Title/Abstract] OR Pradaxa [Title/Abstract] OR rivaroxaban [Title/Abstract] OR Xarelto [Title/Abstract] OR apixaban [Title/Abstract] OR Eliquis [Title/Abstract] OR edoxaban [Title/Abstract] OR Savaysa [Title/Abstract] OR betrixaban [Title/Abstract] OR "factor xa inhibitor\*" [Title/Abstract] OR "factor 10a inhibitor\*" [Title/Abstract] OR "factor iia inhibitor\*" [Title/Abstract] OR "direct thrombin inhibitor\*" [Title/Abstract] OR "non vitamin k antagonists oral anticoagulant\*" [Title/Abstract] OR "non vitamin k antagonist\*" [Title/Abstract] OR noac\* [Title/Abstract] OR "direct oral anticoagulant\*" [Title/Abstract] OR doac\* [Title/Abstract] OR "novel oral anticoagulant\*" [Title/Abstract] OR "new oral anticoagulant\*" [Title/Abstract] OR "new orally active anticoagulant\*" [Title/Abstract] OR bivalirudin [Title/Abstract] OR Argatroban [Title/Abstract]

#9:gastrointestinal hemorrhage [MeSH Terms]

#10: "gastrointestinal hemorrhage" [Title/Abstract] OR "gastrointestinal bleeding" [Title/Abstract] OR GIB [Title/Abstract] OR "gi bleeding" [Title/Abstract] OR "gi hemorrhage" [Title/Abstract] OR "upper gastrointestinal hemorrhage" [Title/Abstract] OR "lower gastrointestinal hemorrhage" [Title/Abstract]

#11:risk factors [MeSH Terms] OR Causality [MeSH Terms] OR probability [MeSH Terms] OR Prognosis [MeSH Terms] OR risk assessment [MeSH Terms]

#12:"risk factor\*" [Title/Abstract] OR Causality [Title/Abstract] OR cause\* [Title/Abstract] OR probability [Title/Abstract] OR Prognosis [Title/Abstract] OR "risk assessment" [Title/Abstract] OR "Prediction model" [Title/Abstract] OR "Predicting" [Title/Abstract] OR "Predicting risk" [Title/Abstract] OR "Risk prediction" [Title/Abstract] OR "Risk Score" [Title/Abstract] OR "Risk Factor Score" [Title/Abstract] OR "Relative Risk" [Title/Abstract]

#13:#1 OR #2 OR #3 OR #4 OR #5 OR #6 OR #7 OR #8

#14:#9 OR #10

#15:#11 OR #12

#16:#13 AND #14 AND #15

Cochrane: 280

#1 MeSH descriptor: [anticoagulants] explode all trees

#2 (Anticoagulant\* OR "anticoagulant agent\*" OR "Anticoagulation Agent\*" OR "indirect thrombin inhibitor\*" OR "Anticoagulant Drug\*" OR "Anticoagulant therapy"):ti,ab,kw

#3 MeSH descriptor: [heparin] explode all trees

#4 MeSH descriptor: [Fondaparinux] explode all trees

#5 MeSH descriptor: [Heparin, Low-Molecular-Weight] explode all trees

#6 (Heparin OR Enoxaparin\* OR dalteparin\* OR tinzaparin\* OR nadroparin\* OR Fondaparinux OR "Heparin, Low-Molecular-Weight" OR "Low Molecular Weight Heparin" OR LMWH OR "Unfractionated heparin" OR UFH):ti,ab,kw

#7:MeSH descriptor: [warfarin] explode all trees

#8:(Warfarin OR "vitamin K antagonist\*" OR VKA\*):ti,ab,kw

#9:MeSH descriptor: [Dabigatran] explode all trees

#10:MeSH descriptor: [Rivaroxaban] explode all trees

#11:MeSH descriptor: [Factor Xa Inhibitors] explode all trees

#12:( "dabigatran" OR "Pradaxa" OR "rivaroxaban" OR "Xarelto" OR "apixaban" OR "Eliquis" OR (Rivaroxaban OR Xarelto OR dabigatran OR Pradaxa OR apixaban OR Eliquis OR edoxaban OR Savaysa OR betrixaban OR "factor Xa inhibitor\*" OR "factor 10a inhibitor\*" OR "factor Ila inhibitor\*" OR "direct thrombin inhibitor\*" OR "non-vitamin K antagonists oral anticoagulant\*" OR "non-vitamin K antagonist\*" OR NOAC\* OR "direct oral anticoagulant\*" OR DOAC\* OR "novel oral anticoagulant\*" OR "new oral anticoagulant\*" OR new orally active anticoagulant\* OR bivalirudin OR Argatroban ):ti,ab,kw

#13:MeSH descriptor: [gastrointestinal hemorrhage] explode all trees  
 #14:(“gastrointestinal hemorrhage” OR “gastrointestinal bleeding” OR GIB OR “GI bleeding” OR “GI hemorrhage” OR “upper gastrointestinal hemorrhage” OR “lower gastrointestinal hemorrhage”):ti,ab,kw  
 #15:MeSH descriptor: [risk factors] explode all trees  
 #16: MeSH descriptor:[Causality] explode all trees  
 #17:MeSH descriptor:[ probability] explode all trees  
 #18:MeSH descriptor:[ Prognosis] explode all trees  
 #19:MeSH descriptor:[ risk assessment] explode all trees  
 #20:( “risk factor\*” OR Causality OR cause\* OR probability OR Prognosis OR “risk assessment” OR “Prediction model” OR Predicting OR “Predicting risk” OR “Risk prediction” OR “Risk Score” OR “Risk Factor Score” OR “Relative Risk” ):ti,ab,kw  
 #21:#1 OR #2 OR #3 OR #4 OR #5 OR #6 OR #7 OR #8 OR #9 OR #10 OR #11 OR #12  
 #22:#13 OR #14  
 #23:#15 OR #16 OR #17 OR #18 OR #19 OR #20  
 #24:#21 AND #22 AND #23  
 Web of science: 769  
 #1:TS=Anticoagulant\* OR “anticoagulant agent\*” OR “Anticoagulation Agent\*” OR “indirect thrombin inhibitor\*” OR “Anticoagulant Drug\*” OR “Anticoagulant therapy”  
 #2:TS=Heparin OR Enoxaparin\* OR dalteparin\* OR tinzaparin\* OR nadroparin\* OR Fondaparinux OR “Heparin, Low-Molecular-Weight” OR “Low Molecular Weight Heparin” OR LMWH OR “Unfractionated heparin” OR UFH  
 #3:TS=Warfarin OR “vitamin K antagonist\*” OR VKA\*  
 #4:TS= Rivaroxaban OR Xarelto OR dabigatran OR Pradaxa OR apixaban OR Eliquis OR edoxaban OR Savaysa OR betrixaban OR “factor Xa inhibitor\*” OR “factor 10a inhibitor\*” OR “factor Ila inhibitor\*” OR “direct thrombin inhibitor\*” OR “non-vitamin K antagonists oral anticoagulant\*” OR “non-vitamin K antagonist\*” OR NOAC\* OR “direct oral anticoagulant\*” OR DOAC\* OR “novel oral anticoagulant\*” OR “new oral anticoagulant\*” OR new orally active anticoagulant\* OR bivalirudin OR Argatroban  
 #5:TS=“gastrointestinal hemorrhage” OR “gastrointestinal bleeding” OR GIB OR “GI bleeding” OR “GI hemorrhage” OR “upper gastrointestinal hemorrhage” OR “lower gastrointestinal hemorrhage”  
 #6:TS=“risk factor\*” OR Causality OR cause\* OR probability OR Prognosis OR “risk assessment” OR “Prediction model” OR Predicting OR “Predicting risk” OR “Risk prediction” OR “Risk Score” OR “Risk Factor Score” OR “Relative Risk”  
 #7:#1 OR #2 OR #3 OR #4  
 #8:#7 AND #5 AND #6  
 Embase: 10146  
 #1 ‘anticoagulant agent’/exp  
 #2 anticoagulant\*:ti,ab,kw OR ‘anticoagulant agent\*’:ti,ab,kw OR ‘anticoagulation agent\*’:ti,ab,kw OR ‘indirect thrombin inhibitor\*’:ti,ab, kw OR ‘anticoagulant drug\*’:ti,ab,kw OR ‘anticoagulant therapy’:ti,ab,kw  
 #3 ‘heparin’/exp OR ‘fondaparinux’/exp OR ‘low molecular weight heparin’/exp  
 #4heparin:ti,ab,kw OR fondaparinux:ti,ab,kw OR ‘heparin, low-molecular-weight’:ti,ab,kw OR ‘low molecular weight heparin’:ti,ab,kw OR lmwh:ti,ab,kw OR ‘unfractionated heparin’:ti,ab,kw OR ufh:ti,ab,kw OR enoxaparin\*:ti,ab,kw OR dalteparin\*:ti,ab,kw OR tinzaparin\*:ti,ab,kw OR nadroparin\*:ti,ab,kw  
 #5‘warfarin’/exp  
 #6warfarin:ti,ab,kw OR ‘vitamin k antagonist\*’:ti,ab,kw OR vka\*:ti,ab,kw  
 #7 ‘dabigatran’/exp OR ‘rivaroxaban’/exp OR ‘apixaban’/exp OR ‘edoxaban’/exp OR ‘blood clotting factor 10a inhibitor’/exp OR ‘betrixaban’/exp OR ‘bivalirudin’/exp OR ‘argatroban’/exp  
 #8rivaroxaban:ti,ab,kw OR xarelto:ti,ab,kw OR dabigatran:ti,ab,kw OR pradaxa:ti,ab,kw OR apixaban:ti,ab,kw OR eliquis:ti,ab,kw OR edoxaban:ti,ab,kw OR savaysa:ti,ab,kw OR betrixaban:ti,ab,kw OR ‘factor xa inhibitor\*’:ti,ab,kw OR ‘factor 10a inhibitor\*’:ti,ab,kw OR ‘factor iia inhibitor\*’:ti,ab,kw OR ‘direct thrombin inhibitor\*’:ti,ab,kw OR ‘non-vitamin k antagonists oral anticoagulant\*’:ti,ab,kw OR ‘non-vitamin k antagonist\*’:ti,ab,kw OR noac\*:ti,ab,kw OR ‘direct oral anticoagulant\*’:ti,ab,kw OR doac\*:ti,ab,kw OR ‘novel oral anticoagulant\*’:ti,ab,kw OR ‘new oral anticoagulant\*’:ti,ab,kw OR ‘new orally active anticoagulant\*’:ti,ab,kw OR bivalirudin:ti,ab,kw OR argatroban:ti,ab,kw  
 #9‘gastrointestinal hemorrhage’/exp  
 #10‘gastrointestinal hemorrhage’:ti,ab,kw OR ‘gastrointestinal bleeding’:ti,ab,kw OR gib:ti,ab,kw OR ‘gi bleeding’:ti,ab,kw OR ‘gi hemorrhage’:ti,ab,kw OR ‘upper gastrointestinal hemorrhage’:ti,ab,kw OR ‘lower gastrointestinal hemorrhage’:ti,ab,kw  
 #11‘risk factor’/exp OR ‘causality’/exp OR ‘probability’/exp OR ‘prognosis’/exp OR ‘risk assessment’/exp  
 #12‘risk factor\*’:ti,ab,kw OR causality:ti,ab,kw OR cause\*:ti,ab,kw OR probability:ti,ab,kw OR prognosis:ti,ab,kw OR ‘risk assess-

ment':ti,ab,kw OR 'prediction model':ti,ab,kw OR predicting:ti,ab,kw OR 'predicting risk':ti,ab,kw OR 'risk prediction':ti,ab,kw OR 'risk score':ti,ab,kw OR 'risk factor score':ti,ab,kw OR 'relative risk':ti,ab,kw  
#13:#1 OR #2 OR #3 OR #4 OR #5 OR #6 OR #7 OR #8  
#14:#9 OR #10  
#15:#11 OR #12  
#16:#13 AND #14 AND #15
